# Supplementary material
Source: publisher figshare collection journal article supplement (https://f1000.figshare.com/ndownloader/files/1216307)
Supplement: Supplementary file 1 [file 1216307]

T2 Line	Sample	16c 0	16c 1	18c 0	18c 1	18c 2	18c 3	20c 1	18c 1 OH	18c 2 OH	Total HFA
RcCb52 34	1	10.99	0.54	4.75	43.13	12.6	5.3	0.58	16.02	6.09	22.1
RcCb52 34	2	10.05	0.49	4.23	44.66	12.69	5.12	0.52	15.23	7	22.23
RcCb52 34	3	13.11	0.79	5.48	42.68	13.39	6.02	0.87	13.69	3.96	17.65
RcCb52 34	4	9.6	0.47	3.71	45.09	13.77	5.3	0.51	14.32	7.24	21.55
RcCb52 34	5	11.65	0.58	4.63	41.62	15.3	5.45	0.75	15.24	4.79	20.03
RcCb52 34	6	10.37	0.55	4.11	46.08	12.49	4.87	0.66	15.05	5.83	20.88
RcCb52 34	7	10.23	0.47	3.83	43.13	14.76	5.5	0.55	14.8	6.72	21.52
RcCb52 34	8	11.42	0.54	4.32	43.76	14.51	5.18	0.77	14.92	4.57	19.49
RcCb52 34	9	11.15	0.51	4.07	42.22	16.1	5.55	0.7	14.81	4.9	19.71
RcCb52 34	10	9.46	0.4	3.57	47.74	12.18	4.76	0.52	14.65	6.72	21.37
Untransformed 34	1	11.62	0.62	5.06	36.63	18.53	6.87	0.65	14.53	5.48	20.01
Untransformed 34	2	11.68	0.59	4.77	36.45	19.01	6.62	0.66	15.06	5.15	20.21
Untransformed 34	3	11.89	0.68	5.2	36.45	17.58	6.27	0.7	16.5	4.72	21.23
Untransformed 34	4	12.46	0.6	4.88	35.04	20.16	6.53	0.82	15.33	4.17	19.5
Untransformed 34	5	12.58	0.61	4.89	33.34	20.89	7	0.78	15.41	4.49	19.9
Untransformed 34	6	12.67	0.64	4.96	34.37	19.64	6.84	0.82	15.78	4.28	20.06
Untransformed 34	7	14.75	0.8	6.32	30.86	20.94	7.2	1	15.16	2.98	18.14
RcCb52 27	1	10.51	0.57	4.31	46.83	11.88	4.74	0.75	15.36	5.05	20.41
RcCb52 27	2	12.31	0.63	5.55	42.66	12.63	4.98	0.94	16.58	3.72	20.29
RcCb52 27	3	12.36	0.58	5.88	43.95	13.68	0.16	0.88	17.52	4.99	22.5
RcCb52 27	4	11.39	0.54	5.13	41.7	14.45	5.32	0.78	15.78	4.91	20.69
RcCb52 27	5	10.43	0.52	4.29	48.05	12.12	4.7	0.75	14.21	4.92	19.13
RcCb52 27	6	10.15	0.46	4.16	48.23	11.43	4.65	0.71	14.43	5.78	20.21
RcCb52 27	7	11.75	0.53	4.61	41.34	15.74	5.56	0.86	15.26	4.35	19.6
RcCb52 27	8	10.67	0.51	4.54	44.5	13.83	5.22	0.73	14.67	5.33	20
RcCb52 27	9	10.75	0.51	4.38	44.48	13.32	5.15	0.69	15.34	5.37	20.71
Untransformed 27	1	13.62	0.68	6.03	32.31	20.1	6.74	0.92	15.59	4	19.59
Untransformed 27	2	16.48	0.7	6.64	28.25	23.02	7.14	1.18	13.88	2.71	16.59
Untransformed 27	3	12.88	0.59	5.31	31.95	22.65	6.93	0.89	14.67	4.13	18.8
Untransformed 27	4	12.98	0.53	5.07	33.9	21.46	6.74	0.9	14.39	4.03	18.42
Untransformed 27	5	11.02	0.49	4.61	37.99	18.62	6.15	0.66	14.82	5.63	20.45
Untransformed 27	6	12.84	0.6	5.24	35.03	19.29	6.52	0.83	15.47	4.18	19.65
RcCb52 33	1	9.01	0.46	3.79	48.12	12.26	4.72	0.56	14.27	6.81	21.08
RcCb52 33	2	9.04	0.47	3.93	48.42	10.85	4.46	0.55	15.07	7.21	22.28
RcCb52 33	3	9.56	0.69	4.6	49.11	9.84	4.07	0.74	16.52	4.89	21.41
RcCb52 33	4	9.4	0.53	4.52	49.19	9.15	4.23	0.64	15.71	6.62	22.33
RcCb52 33	5	10.45	0.5	4.34	47.83	10.25	4.37	0.75	16.34	5.18	21.52
RcCb52 33	6	10.69	0.61	5.29	44.83	11.9	4.63	0.77	16.38	4.91	21.29
RcCb52 33	7	11.58	0.6	5.21	37.44	18.15	5.96	0.78	15.42	4.85	20.28
RcCb52 33	8	11.78	0.83	6.26	41.36	13.08	5.23	1.03	17.44	3	20.44
RcCb52 33	9	10.04	0.52	4.47	44.68	12.37	4.79	0.63	16.44	6.07	22.51
RcCb52 33	10	11.37	0.81	5.67	42.43	12.54	5.09	0.93	17.96	3.21	21.16
Untransformed 33	2	11.15	0.61	4.65	35.99	19.15	6.38	0.64	15.79	5.64	21.42
Untransformed 33	3	11.53	0.05	4.16	37.5	18.51	6.19	0.66	16.44	4.95	21.4
Untransformed 33	4	11.1	0.57	4.67	37.47	18.98	6.16	0.75	15.68	4.62	20.3
Untransformed 33	5	10.41	0.55	4.69	45.59	10.63	4.52	0.63	16.92	6.05	22.97
Untransformed 33	6	11.08	0.63	5.18	44.17	10.33	4.68	0.79	18.71	4.44	23.15
Untransformed 33	7	10.98	0.69	5.62	42.62	11.93	5.05	0.79	17.6	4.72	22.32
Untransformed 33	8	11.15	0.65	4.93	36.94	18.67	6.29	0.69	15.45	5.22	20.67
RcCb53 43	2	11.89	0.61	5.18	42.85	15.02	0.16	0.82	18.38	5.09	23.47
RcCb53 43	3	11.21	0.63	4.55	40.55	14.14	5.24	0.62	18.06	5	23.06
RcCb53 43	4	14.08	0.76	6.17	35.96	16.49	5.89	0.96	16.47	3.23	19.7
RcCb53 43	5	12.29	0.64	5.85	39.87	13.9	5.19	0.9	17.68	3.68	21.36
RcCb53 43	6	12.05	0.66	5.22	38.72	15.28	5.82	0.73	17.09	4.44	21.53
RcCb53 43	7	14.25	0.72	6.88	30.21	20.01	6.52	0.95	17.39	3.07	20.45
RcCb53 43	8	11.17	0.57	5.15	40.67	13.63	4.98	0.71	17.75	5.37	23.12
RcCb53 43	9	12.01	0.58	5.23	38.97	14.48	5.12	0.74	18.16	4.7	22.86
RcCb53 43	10	12.1	0.63	5.45	39.31	14.7	5.51	0.76	17.35	4.2	21.54
Untransformed 43	1	10.66	0.49	4.1	37.63	17.21	6.24	0.54	16.65	6.49	23.14
Untransformed 43	2	11.87	0.59	4.97	36.7	17.2	6.12	0.7	17.03	4.81	21.84
Untransformed 43	3	14.61	0.64	6.59	31.34	19.66	6.79	0.99	15.83	3.54	19.37
Untransformed 43	4	19.08	0.78	8.26	30.09	23.03	0.46	1.39	14.43	2.49	16.91
Untransformed 43	5	17.38	0.84	7.36	31.43	22.5	0.23	1.18	15.96	3.12	19.08
Untransformed 43	6	11.67	0.59	4.32	39.55	16.17	5.59	0.62	16.58	4.9	21.48
Untransformed 43	7	10.46	0.55	4.12	41.76	14	5.07	0.53	17.19	6.32	23.51
Untransformed 43	8	9.94	0.53	4.03	44.68	12.44	4.58	0.54	16.96	6.3	23.26
Untransformed 43	9	11.61	0.55	5.54	38.65	15.13	5.39	0.73	17.48	4.92	22.4
RcCb54 40	1	10.99	0.56	4.33	39.42	16.16	5.64	0.57	16.5	5.82	22.32
RcCb54 40	2	10.61	0.51	4.29	39.92	16.06	5.55	0.53	16.03	6.5	22.53
RcCb54 40	3	10.63	0.51	4.21	40.87	15.9	5.35	0.54	15.98	6.01	21.99
RcCb54 40	4	11.09	0.54	4.68	40.14	15.65	5.28	0.58	16.39	5.65	22.04
RcCb54 40	5	10.38	0.47	4.19	41.93	15.38	5.23	0.55	15.65	6.23	21.88
RcCb54 40	6	13.06	0.69	5.72	38.32	18.8	0.66	0.78	17.45	4.52	21.97
RcCb54 40	7	12.42	0.72	5.27	37.52	16.09	5.61	0.72	17.65	4	21.65
RcCb54 40	8	12.45	0.65	4.94	38.72	16.99	5.5	0.69	16.05	4	20.06
RcCb54 40	9	11.95	0.58	4.7	39.02	16.87	5.57	0.67	16.22	4.43	20.66
RcCb54 40	10	12.19	0.61	4.65	37.67	18.14	5.9	0.73	16.08	4.03	20.11
Untransformed 40	1	12.13	0.69	5.19	38.12	15.85	5.45	0.67	17.66	4.25	21.91
Untransformed 40	2	13.84	0.71	5.83	32.81	19.8	6.49	0.82	15.7	4	19.69
Untransformed 40	3	13.99	0.76	6.43	36.34	19.28	0.19	0.96	17.94	4.12	22.06
Untransformed 40	4	14.83	0.7	6.77	33.66	17.7	6.41	1.01	16.02	2.93	18.94
